# Supplementary material for: Black Sorghum Phenolic Extract Regulates Expression of Genes Associated with Oxidative Stress and Inflammation in Human Endothelial Cells
Source: PubMed Central journal article supplement (PMC6767043; doi:10.3390/molecules24183321), 2019-09-12
Supplement: molecules-24-03321-s001.pdf [file molecules-24-03321-s001.pdf]

## Supplementary Materials

Key findings from Rao, S., A.B. Santhakumar, K.A. Chinkwo, G. Wu, S.K. Johnson, and C.L. Blanchard, J. Cereal Sci., 2018, 84, 103; are listed below.

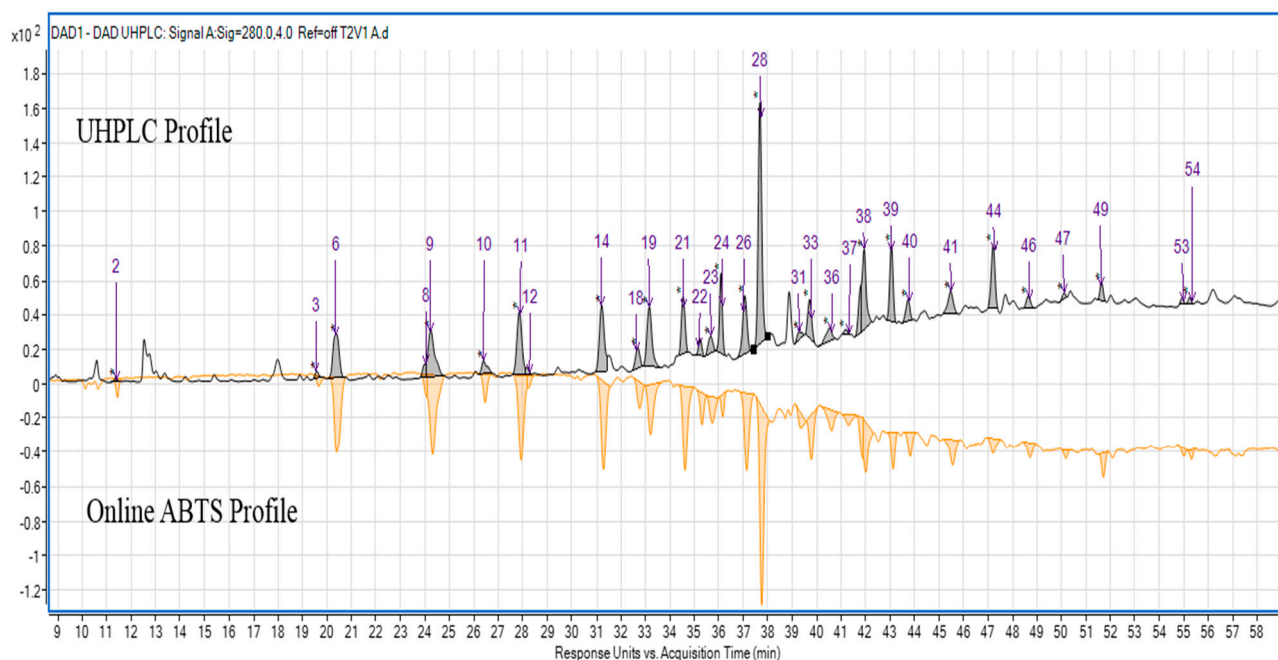

**Figure 1.** UHPLC online ABTS mapping of phenolic compounds from black pericarp sorghum variety Shawaya short black 1.

**Table 1.** Phenolic composition and antioxidant activity of sorghum varieties on as is basis.

| Variety               | TPC mg/g GAE              | TPAC mg/g CE             | DPPH mg/g TE              | FRAP mg/g TE              |
|-----------------------|---------------------------|--------------------------|---------------------------|---------------------------|
| Shawaya short black 1 | 11.50 ± 1.81 <sub>a</sub> | 3.02 ± 0.72 <sub>a</sub> | 18.04 ± 3.53 <sub>a</sub> | 20.92 ± 2.69 <sub>a</sub> |
| IS 13116 (Brown)      | 3.58 ± 1.63 <sub>b</sub>  | 5.55 ± 0.40 <sub>b</sub> | 21.02 ± 5.17 <sub>a</sub> | 4.62 ± 3.19 <sub>b</sub>  |
| QL33/QL36 (red)       | 0.88 ± 0.17 <sub>c</sub>  | 0.47 ± 0.23 <sub>c</sub> | 1.17 ± 0.48 <sub>b</sub>  | 4.83 ± 2.54 <sub>b</sub>  |
| B923296 (red)         | 0.66 ± 0.27 <sub>c</sub>  | 0.41 ± 0.28 <sub>c</sub> | 0.41 ± 0.14 <sub>b</sub>  | 2.72 ± 1.35 <sub>b</sub>  |
| QL12 (white)          | 0.24 ± 0.03 <sub>c</sub>  | 0.09 ± 0.26 <sub>c</sub> | 0.33 ± 0.10 <sub>b</sub>  | 2.31 ± 1.55 <sub>b</sub>  |
| QL33 (red)            | 0.75 ± 0.23 <sub>c</sub>  | 0.60 ± 0.39 <sub>c</sub> | 0.76 ± 0.18 <sub>b</sub>  | 3.43 ± 2.37 <sub>b</sub>  |

Different letters in the different columns represent significant difference at  $p < 0.05$ . CE (Catechin equivalents), DPPH (2, 2-diphenyl-1-picrylhydrazyl), FRAP (Ferric reducing ability of plasma assay), GAE (Gallic acid equivalents), TE (Trolox equivalents), TPC (Total phenolic content) and TPAC (Total proanthocyanidin content).

**Table 2.** List of top ten phenolic compounds identified in the black sorghum phenolic rich extracts by Q-TOF LC/MS and quantified using UHPLC-Online ABTS system (Adapted from Rao et al., 2018)

| Compound                                                | Phenolic quantity (mg 100mg <sup>-1</sup> GAE) | Antioxidant activity (mg 100mg <sup>-1</sup> TE) |
|---------------------------------------------------------|------------------------------------------------|--------------------------------------------------|
| Catechin derivative                                     | 2.11 ± 0.47                                    | 1.51 ± 0.27                                      |
| Catechin                                                | 1.97 ± 0.36                                    | 1.54 ± 0.25                                      |
| Pentahydroxyflavanone-(3->4)-catechin-7-O-glucoside     | 1.80 ± 0.28                                    | 2.62 ± 0.36                                      |
| Catechin derivative                                     | 0.66 ± 0.13                                    | 1.42 ± 0.24                                      |
| Pyrano-eriodictyol-(3->4)-catechin-7-O-glucoside        | 0.65 ± 0.14                                    | 0.78 ± 0.16                                      |
| 1-O-Caffeoylglycerol-O-glucoside                        | 0.65 ± 0.12                                    | 1.74 ± 0.33                                      |
| N'.n'-dicafferoylspermidine                             | 0.61 ± 0.12                                    | 0.98 ± 0.15                                      |
| Pyrano-eriodictyol-(3->4)-catechin-7-O-glucoside isomer | 0.55 ± 0.08                                    | 0.60 ± 0.06                                      |
| Robinetinidol-(4α->6)-catechin-(6->4α)-robinetinidol    | 0.53 ± 0.11                                    | 1.25 ± 0.20                                      |
| Pyrano-naringenin-(3->4)-catechin-7-O-glucoside isomer  | 0.53 ± 0.07                                    | 0.42 ± 0.06                                      |

**Table 3.** Amplification efficiency of primers used in this study determined after running a standard curve.

| Gene    | Amplification efficiency - E (%) |
|---------|----------------------------------|
| Nrf2    | 107%                             |
| NQO1    | 101.6%                           |
| HO1     | 101.5%                           |
| NOX4    | 107%                             |
| eNOS    | 94.1%                            |
| MCP1    | 95.2%                            |
| ICAM1   | 100.1%                           |
| CD39    | 101%                             |
| CD73    | 93%                              |
| β-Actin | 95.5%                            |
